# Supplementary material for: Enhanced energy efficiency of aqueous organic redox flow batteries: carbon-based heterostructure electrodes guided by an interface engineering strategy
Source: Royal Society of Chemistry journal article supplement (doi:10.1039/d4ta04723k), 2024-01-01
Supplement: d4ta04723k1.pdf [file d4ta04723k1.pdf]

## Supplementary Material

### **Enhanced energy efficiency in aqueous organic redox flow batteries: Carbon-based heterostructure electrodes guided by interface engineering strategy**

Xiaohui Yang <sup>a</sup>, Xiong Li <sup>a</sup>, Tongle Xu <sup>a</sup>, Hongyun Cai <sup>b,c</sup>, Can Zhao <sup>c</sup>, Na Song <sup>a</sup>,  
Peng Ding <sup>a\*</sup>

<sup>a</sup> Research Center of Nanoscience and Nanotechnology, College of Sciences, Shanghai University, 99 Shangda Road, Shanghai, 200444, PR China

<sup>b</sup> Suqian Unitech Co., LTD, 88 Yangzi Road, Suqian, 223800, PR China

<sup>c</sup> Suqian time energy storage Technology Co., LTD, 67 Huashan Road, Suqian, 223800, PR China

\*Corresponding author, Email: [dingpeng@shu.edu.cn](mailto:dingpeng@shu.edu.cn)

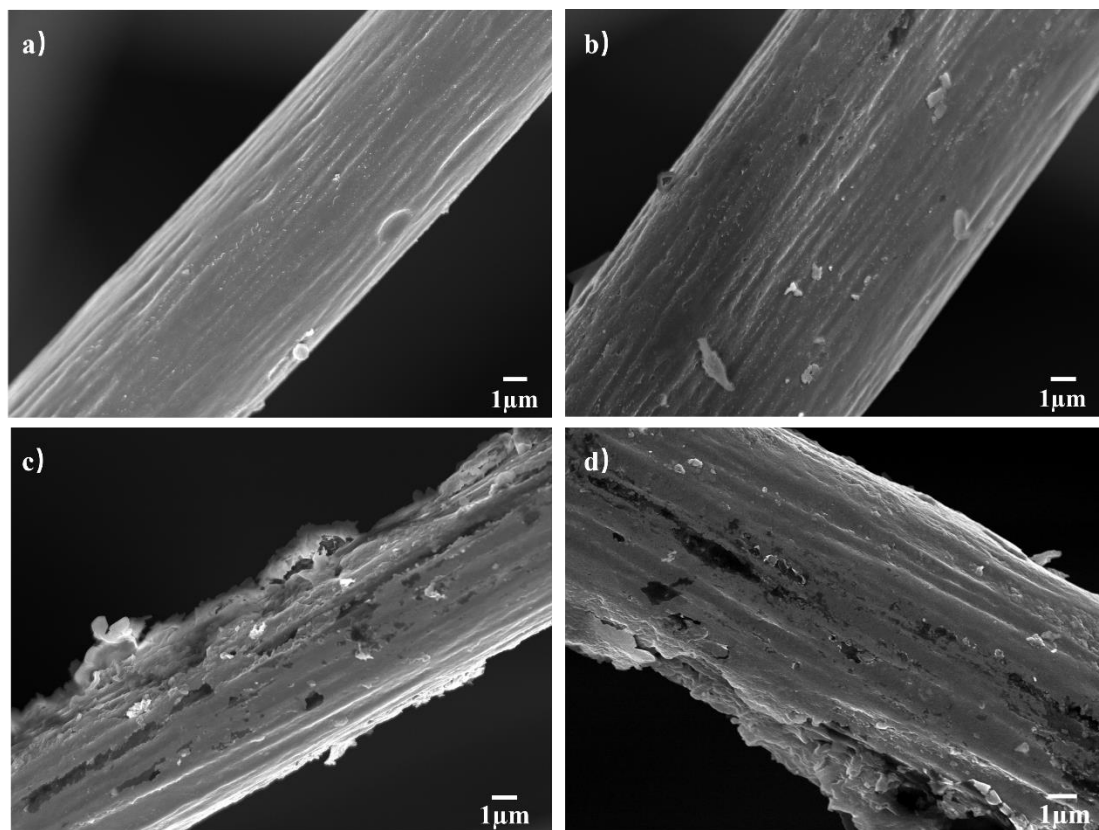

Fig. S1 SEM images of rGO-CF-1(a, b) and rGO-CF-5 (c, d).

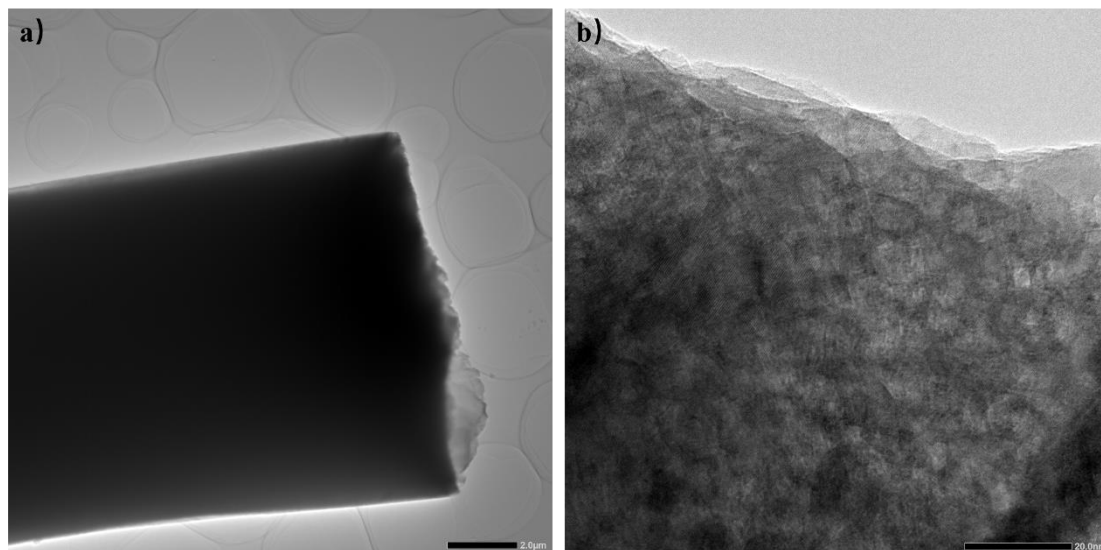

Fig. S2(a,b) The HRTEM images of CF.

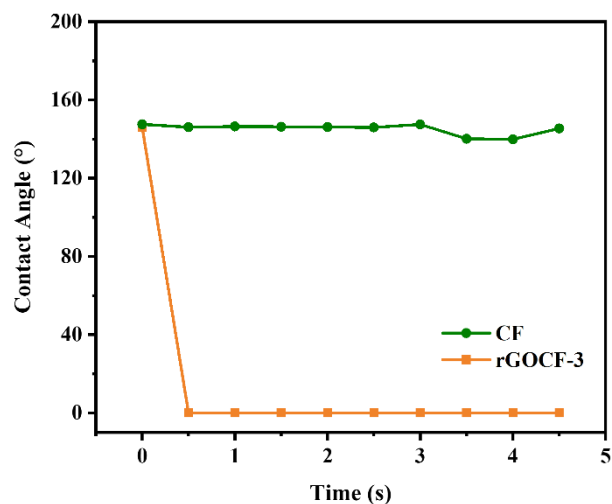

Fig. S3 Contact angles of CF and rGO CF-3.

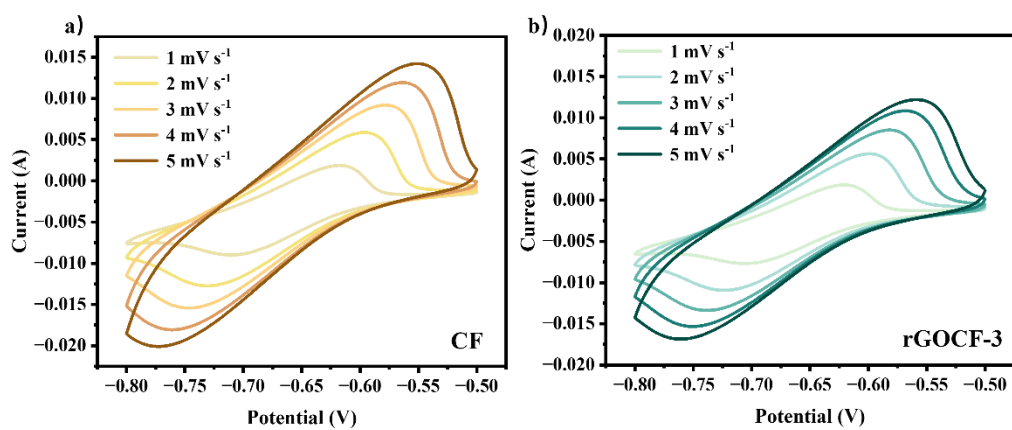

Fig. S4 CV curves of the CF (a) and rGO CF-3 (b) electrodes at various scan rates in negative reactions.

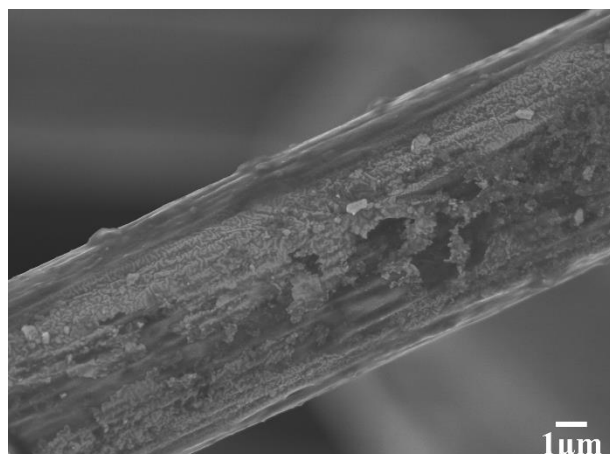

Fig. S5 The SEM images of rGO CF-3 after the cell test.

| Electrode | Positive      |              |               |              |                 |                | Negative      |              |               |              |                 |                |
|-----------|---------------|--------------|---------------|--------------|-----------------|----------------|---------------|--------------|---------------|--------------|-----------------|----------------|
|           | $I_{pa}$ (mA) | $E_{pa}$ (V) | $I_{pc}$ (mA) | $E_{pc}$ (V) | $I_{pa}/I_{pc}$ | $\Delta E$ (V) | $I_{pa}$ (mA) | $E_{pa}$ (V) | $I_{pc}$ (mA) | $E_{pc}$ (V) | $I_{pa}/I_{pc}$ | $\Delta E$ (V) |
| CF        | 11.19         | 0.829        | -8.86         | 0.651        | 1.26            | 0.178          | 1.87          | -0.619       | -7.74         | -0.706       | 0.24            | 0.087          |
| rGOCF-1   | 12.88         | 0.842        | -10.55        | 0.639        | 1.22            | 0.203          | 1.75          | -0.618       | -8.55         | -0.703       | 0.20            | 0.085          |
| rGOCF-3   | 15.86         | 0.835        | -13.57        | 0.644        | 1.16            | 0.191          | 2.21          | -0.617       | -8.79         | -0.699       | 0.25            | 0.082          |
| rGOCF-5   | 12.93         | 0.828        | -10.94        | 0.647        | 1.18            | 0.181          | 2.36          | -0.615       | -8.32         | -0.705       | 0.28            | 0.090          |

Table S1. Electrochemical properties obtained from CV curves of the positive and negative reactions on various electrodes.

| Electrode | Positive                                 |                                          |                               | Negative                                 |                                          |                               |
|-----------|------------------------------------------|------------------------------------------|-------------------------------|------------------------------------------|------------------------------------------|-------------------------------|
|           | $D_1$<br>( $\text{cm}^2 \text{s}^{-1}$ ) | $D_2$<br>( $\text{cm}^2 \text{s}^{-1}$ ) | $k$<br>( $\text{cm s}^{-1}$ ) | $D_1$<br>( $\text{cm}^2 \text{s}^{-1}$ ) | $D_2$<br>( $\text{cm}^2 \text{s}^{-1}$ ) | $k$<br>( $\text{cm s}^{-1}$ ) |
| CF        | $2.9 \times 10^{-4}$                     | $1.94 \times 10^{-4}$                    | $2.37 \times 10^{-2}$         | $8.38 \times 10^{-6}$                    | $1.44 \times 10^{-4}$                    | $2.98 \times 10^{-2}$         |
| rGOCF-3   | $6.13 \times 10^{-4}$                    | $4.7 \times 10^{-4}$                     | $2.77 \times 10^{-2}$         | $1.17 \times 10^{-5}$                    | $1.85 \times 10^{-4}$                    | $5.3 \times 10^{-2}$          |

(Note: D1 is the peak oxidation current, D2 is the peak reduction current)

Table S2. Electrochemical properties obtained from Equation S1-S3 of the positive and negative reactions on CF and rGOCF-3.

The Randles-Sevcik equation (Equation S1) and the Nicholson's method (Equation S2-3) are as follows:

When the measured solution temperature is 25°C :

$$i_p = 2.69 \times 10^5 n^{\frac{3}{2}} A D^{\frac{1}{2}} C \nu^{\frac{1}{2}} \quad (\text{Equation S1})$$

$$\psi = \frac{-0.6288 + 0.0021 \Delta E_p}{1 - 0.0017 \Delta E_p} \quad (\text{Equation S2})$$

$$\psi = k \left( \frac{\pi D n F}{RT} \right)^{-\frac{1}{2}} \nu^{-\frac{1}{2}} \quad (\text{Equation S3})$$

In the formula,  $i_p$  represents the peak current in the cyclic voltammetry curve, with the unit is ampere;  $n$  is the number of electrons transferred in redox reaction;  $A$  is the area of the working electrode, in  $\text{cm}^2$ ;  $D$  is the diffusion coefficient of the active substance, in  $\text{cm}^2 \text{s}^{-1}$ ;  $C$  is the concentration of the active substance in the solution, in  $\text{mol cm}^{-3}$ ;  $\nu$  is the scanning rate set at that time, in  $\text{Vs}^{-1}$ ;  $\Delta E_p$  is the peak potential difference, in mV;  $F$  is Faraday's constant, in  $\text{C mol}^{-1}$ ;  $R$  is the gas constant, in  $\text{J K}^{-1} \text{mol}^{-1}$ ;  $T$  is the thermodynamic temperature, in K;  $k$  is the electron transfer rate constant, in  $\text{cm s}^{-1}$ .

Energy efficiency ( $\eta$ ) is the ratio of discharge energy to charge energy, expressed as a percentage. The calculation formula is as follows:

$$\eta = \left( \frac{E_{\text{discharge}}}{E_{\text{charge}}} \right) \times 100\% \quad (\text{Equation S4})$$

| Carbon electrode                                              | Electrolyte type                            | Current density (mA cm <sup>-2</sup> ) | CE (%)      | VE (%)      | EE (%)      | Ref              |
|---------------------------------------------------------------|---------------------------------------------|----------------------------------------|-------------|-------------|-------------|------------------|
| high temperature etching and carbon nanoparticles modified/GF | MV/4-HO-TEMPO                               | 80                                     | -           | -           | 54.4        | 1                |
| N/S heteroatoms and Ti doped WO <sub>3</sub> modified/GF      | DHAQ/K <sub>4</sub> Fe(CN) <sub>6</sub>     | 40                                     | 70.64       | -           | -           | 2                |
| rGO/GF                                                        | MV/4-HO-TEMPO                               | 60                                     | 94.2        | 56.7        | 50.4        | 3                |
| N/B codoped/GF                                                | 1,8-DHAQ/K <sub>4</sub> Fe(CN) <sub>6</sub> | 60                                     | 67.9        | -           | -           | 4                |
| 3D rGO/CP                                                     | MV/4-HO-TEMPO                               | 50                                     | 82.17       | 57.29       | 46.15       | 5                |
| Spherical mesoporous carbon modified/CC                       | AQS/BQDS                                    | 30                                     | 95.3        | -           | 58.90       | 6                |
| N <sub>2</sub> Plasma treated/CF                              | Tiron/AQDS                                  | 60                                     | -           | 62.4        | 62.1        | 7                |
| PEG-rGO/CF                                                    | 2,7-AQDS/FerrocyanideFB                     | 50                                     | 98.8        | -           | 49.6        | 8                |
| <b>3D heterostructure rGo/CF</b>                              | <b>MV/TEMPTMA</b>                           | <b>50</b>                              | <b>99.5</b> | <b>80.1</b> | <b>80.1</b> | <b>This work</b> |
|                                                               |                                             | <b>70</b>                              | <b>99.4</b> | <b>73.4</b> | <b>73.3</b> |                  |

Table S3. The comparison in the performances of AORFBs using carbon electrode.

## References

1. C. T. Nie, H. J. Han, Y. H. Li, S. H. Zheng and Y. Wang, *ACS Appl. Nano. Mater.*, 2024, **7**, 9950-9959.
2. X. Cai and C. Huang, *Electrochim. Acta*, 2024, **493**, 144382.
3. X. Li and C. Huang, *RSC Adv.*, 2020, **10**, 6333-6341.
4. J. Deng, X. Cai and C. Huang, *Energy Storage*, 2022, **5**, e435.
5. X. Li, J. Li, C. Huang and W. Zhang, *Electrochim. Acta*, 2019, **301**, 240-250.
6. W. Kakaen, L. Intakhuen, A. Siyasukh and K. Punyawudho, *Int. J. Hydrogen Energy*, 2021, **46**, 6448-6460.
7. A. Permatasari, J. W. Shin, W. Lee, J. An and Y. Kwon, *Int. J. Energy Res.*, 2021, **45**, 17878-17887.
8. A. J. Molina-Serrano, J. M. Luque-Centeno, D. Sebastian, L. F. Arenas, T. Turek, I. Vela, F. Carrasco-Marin, M. J. Lazaro and C. Alegre, *ACS Appl Energy Mater*, 2024, **7**, 2779-2790.
